# Supplementary figures and images for: Cold atmospheric plasma induces stress granule formation via an eIF2α-dependent pathway
Source: Royal Society of Chemistry journal article supplement (doi:10.1039/d0bm00488j), 2020-01-01

**A**

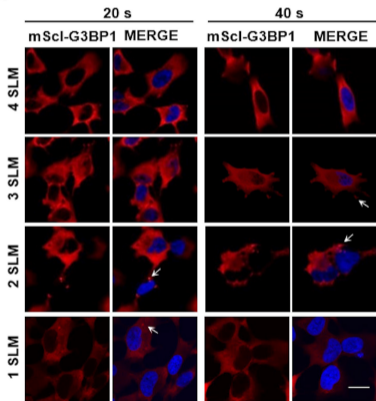

**B**

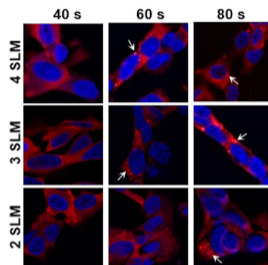

**C**

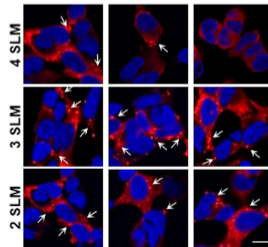

Supplement: d0bm00488j4.pdf [file d0bm00488j4.pdf]

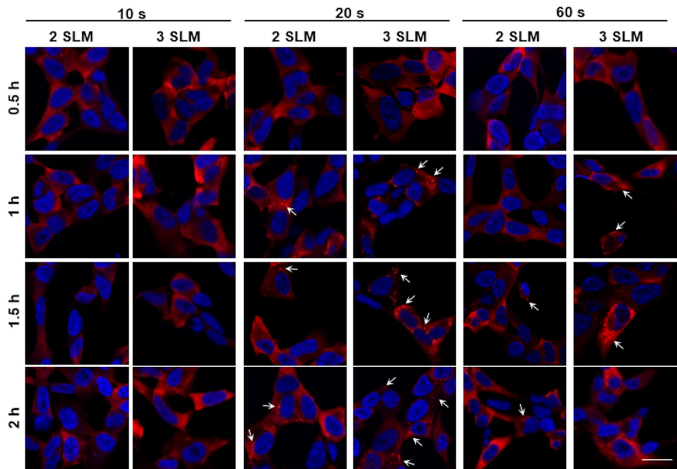

Supplement: d0bm00488j5.pdf [file d0bm00488j5.pdf]
